# Supplementary material
Source: PubMed Central journal article supplement (PMC3641603)
Supplement: cr201346x1.pdf [file cr201346x1.pdf]

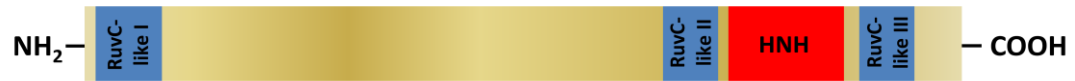

**Supplementary information, Figure S1** Schematic diagram of Cas9 containing two nuclease domains. One is RuvC-like domain containing three predicted RuvC-like motifs shaded by blue. The other one contains HNH motif shaded by red.
