# Supplementary material
Source: PubMed Central journal article supplement (PMC3641603)
Supplement: cr201346x2.pdf [file cr201346x2.pdf]

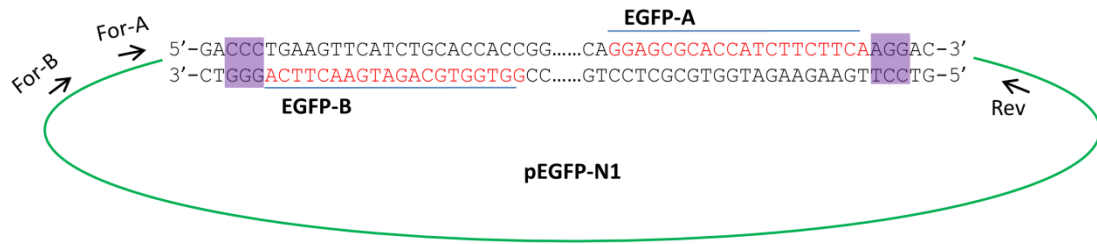

**Supplementary information, Figure S2** Two target sites were selected in pEGFP-N1 plasmid. Target sites were shown in red letters and labeled with EGFP-A and EGFP-B, respectively. Primers (arrows) flanking the target site were designed to amplify the targeted region. The PCR product is 493 bp which was amplified by For-A/Rev for EGFP-A target site. 659 bp amplicon was amplified by For-B/Rev for EGFP-B target site. For-A: 5'-agcaagggcgaggagctgttc-3', For-B: 5'-cgcaaatgggcggttagcgtg-3', Rev: 5'-tgaagttcaccttgatgccgttc-3'.
