# Supplementary material
Source: PubMed Central journal article supplement (PMC3641603)
Supplement: cr201346x4.pdf [file cr201346x4.pdf]

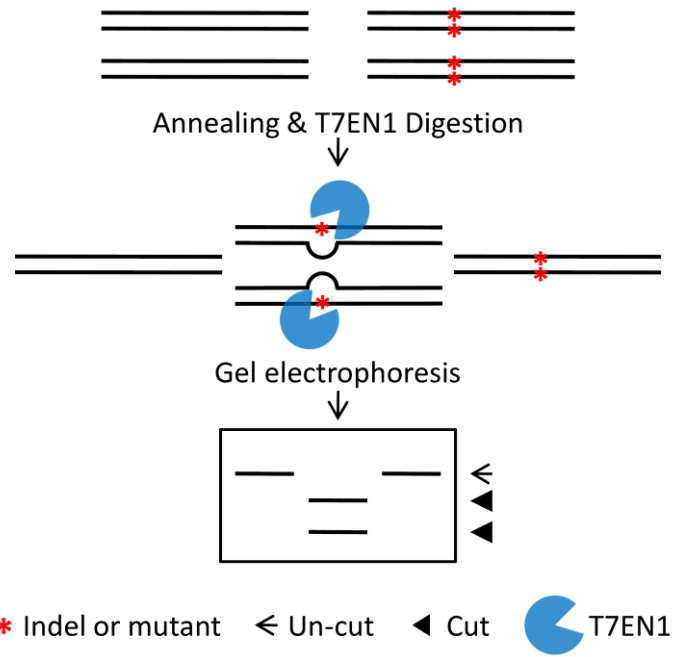

**Supplementary information, Figure S4** Schematic diagram of T7EN1 cleavage assay. PCR products were amplified from targeted region, and then denatured and annealed. Hybridized DNA was digested by T7EN1, which recognizes and cleaves non-perfectly matched DNA after repair of DNA cleavage. Cleaved bands were detected by gel electrophoresis.
