# Supplementary material
Source: PubMed Central journal article supplement (PMC3641603)
Supplement: cr201346x6.pdf [file cr201346x6.pdf]

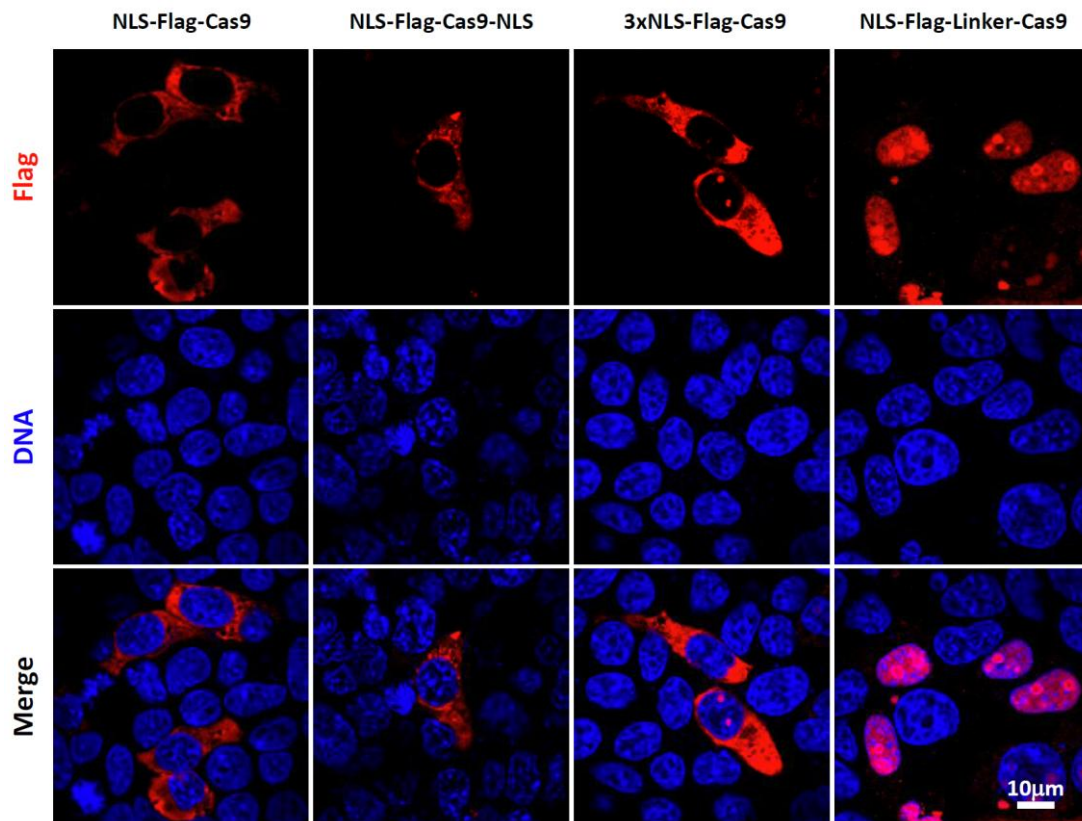

**Supplementary information, Figure S6** Nuclear localization of Cas9 by adding NLS-flag-linker fragment to N terminal of Cas9. Cas9 was over-expressed in 293T cells. Its localization was detected by immunostaining with anti-flag antibody. Cas9 was tagged with NLS in N-terminus, both N- and C-termini, triple NLS in N-terminus, or NLS-flag-linker as indicated. Cas9 nuclear compartmentalization was only visualized in the cells transfected with NLS-flag-linker-Cas9.
