# Supplementary material
Source: PubMed Central journal article supplement (PMC3641603)
Supplement: cr201346x7.pdf [file cr201346x7.pdf]

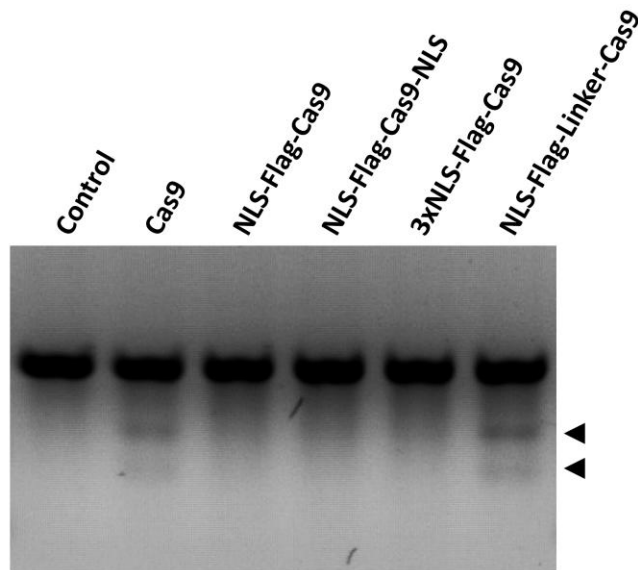

**Supplementary information, Figure S7** The effects of Cas9 tagging on cleavage. 100 ng/ $\mu$ l EGFP-A chimeric RNA and 400 ng/ $\mu$ l Cas9 mRNA with different tags as indicated were injected into zebrafish embryos. Cleavage activity analyses were performed as described in materials and methods. Arrowheads indicated two clear cleavage bands (about 295 bp and 198 bp) from reactions with naked Cas9 and stronger cleavage bands from reactions with NLS-flag-linker tagged Cas9, whereas very weak cleavage bands were detected in reaction with other tagged Cas9.
