# Supplementary material
Source: PubMed Central journal article supplement (PMC3641603)
Supplement: cr201346x8.pdf [file cr201346x8.pdf]

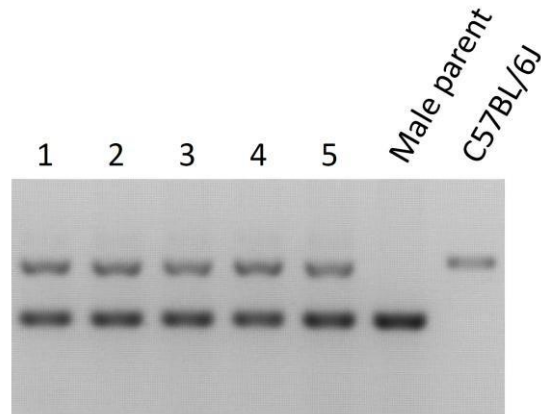

**Supplementary information, Figure S8** Genotyping of the transgenic founders. Transgenic founders were generated by co-injection of 20 ng/ $\mu$ l NLS-flag-linker-Cas9 mRNA and 20 ng/ $\mu$ l pre-annealed EGFP-A chimeric RNA into zygotes obtained by mating of Pouf5-IRES-EGFP knock-in males with C57BL/6J females. Genotyping was performed by PCR amplification of the target site using genomic DNA extracted from tails of the founders as template. Knock-in band, 234bp; WT band, 434bp.
