# Supplementary material
Source: PubMed Central journal article supplement (PMC3641603)
Supplement: cr201346x10.pdf [file cr201346x10.pdf]

|                            |                                                                                                            |
|----------------------------|------------------------------------------------------------------------------------------------------------|
| Cas9-N-3NLS Temp           | gctggctagcaccatgggacctaagaaaaagaggaaggtgcctaagaaaaaga<br>ggaaggtgcctaagaaaaagaggaaggtggcggccgctgactacaagga |
| Cas9 C-NLS Cla1 For        | gagagatccagcttcgagaagaatc                                                                                  |
| Cas9 C-NLS Apa1 Rev        | gaaggggccctacaccttctcttttcttagggtcgccgccgagctgagacag                                                       |
| Cas9-N-3NLS For            | agctggctagcaccatgggac                                                                                      |
| Cas9-N-3NLS Rev            | tcctttagtcagcggccgc                                                                                        |
| Cas9-N-NLS-flag-linker For | caaggatgacgacgataaatctag                                                                                   |
| Cas9-N-NLS-flag-linker Rev | gaagactagtgtgggtccgctggtgtctggtcagagcacc                                                                   |

**Supplementary information, Table S1** Oligonucleotides for constructing Cas9 expression

vectors.
