# Supplementary material
Source: PubMed Central journal article supplement (PMC3641603)
Supplement: cr201346x11.pdf [file cr201346x11.pdf]

|                                       |                        |                                                                       |
|---------------------------------------|------------------------|-----------------------------------------------------------------------|
| chimeric<br>RNA<br>template<br>oligos | EGFP-A<br>chiRNA oligo | <b>GAAATTAATACGACTCACTATA</b> <i>ggagcgcaccatcttctca</i> <b>GTTTT</b> |
|                                       |                        | <b>AGAGCTAGAAATAGCAAGTTAAAATAAGGCTAGTCCG</b>                          |
| Primers                               | EGFP-B<br>chiRNA oligo | <b>GAAATTAATACGACTCACTATA</b> <i>Gggtggtgcagatgaactca</i> <b>GTT</b>  |
|                                       |                        | <b>TTAGAGCTAGAAATAGCAAGTTAAAATAAGGCTAGTCCG</b>                        |
|                                       | chiRNA-For             | <b>gaaattaatacgactcactatag</b>                                        |
|                                       | chiRNA-Rev             | <b>cggactagccttattttaactg</b>                                         |

Italic, spacer sequence; bold, T7 promoter.

**Supplementary information, Table S2** Oligonucleotides for preparing RNA template.
