# Supplementary material
Source: PubMed Central journal article supplement (PMC3641603)
Supplement: cr201346x13.pdf [file cr201346x13.pdf]

**Supplementary information, Data S2** ORF sequence harboring Cas9 for each expression vector.

Only ORF (open reading frame) sequence harboring Cas9 is listed for each expression vector. Start and stop codon are highlighted by red.

pST1374-Cas9

atggacaagaaatacttattggactggatcgggacaaactccgttgctggccgtcataaccgacgagtataaggtccaagca  
agaaattcaaggtgctgggtaactgaccgccattcaatcaagaacacgtatcggagcactcctcttcgactccggtgaaaccgct  
gaagctactcggctgaagcggaccgcaagcggagataccccgcccaagaatcggatattatctgcaagagatctttaagcaac  
gaaatggctaaggtggacgactcctcttcaccgcctggaagagacttctggtggaggaggataagaaacacgagaggcacccta  
tattcggaaatcgtggatgaggtgcttfaccatgaaaagtacctacaatctaccatctgaggaagaagctggtggacagcaccgata  
aagcagacctgaggctcatctatctggccctggctcatatgataaagtttagaggacactttctgacgagggcgacctgaatcccgata  
attccgatgtggataaactcttcaactggtgcagacatataaccaactgttcgaggagaatccataaacgcttctggtgtggatgc  
caaggtattctgtccgctcggctgtccaagtcacgcagactggagaatctgattgcccaactgccaggagaaaagaagcggcctg  
ttgggaacctcaccgctgagcctggcctgacacctaactcaagtccaatttctgctggccgaagatgctaaactccagctctcca  
aggacacctatgacgatgatctggacaacctgctgcacagatagggcaccagctacgccgatctttctggctgtaagaatctctcc  
gacgccattctgctgagcgacatactccgggtcaactgagatcaccaaagcactctgagcgcctccatgataaaacgctatgatga  
acaccatcaagacctgactctgctcaaagccctctgaggcaacagctgccagagaaagtacaaagagatattcttcgaccagagcaa  
gaatggatgccggatacatcgatggcggagcatcacaggaagaattttacaagttcatcaaaccaatcctcgagaagatggacggt  
actgaagagctgctggtgaagctgaacagggagacactgctgaggaagcagaggacctttgataatggctccattccacatcagatac  
acctgggagagctgcatgcaatcctccgagcagaggagattctatccttctgaaagataaccgggagaagatagagaagatcct  
gacctcaggatcccttattacgtcggccctctggctagaggcaactcccgttcgcttggatgaccaggaaatctgaggagacaattac  
tccttggaaactcgaagagctggtgataaggcgcgaagcggcagctcattcatcgaacggatgaccaatttcgataagaacctgccc  
aacgagaagctcctgcccacaactcctctgacgagatctaccgtctataacgagctgactaaagtgaagtacgtgaccgaggg  
catgaggaaagcctgcttctgtccggagagcagaagaaggctatcgttgatctgctcttcaagactaatagaaaggtgacagtgaagc  
agctcaaggaggattactttaagaagatgaatgctttgactcagtgaaatctctggcgtggagaccgctttaatgccagcctgggca  
cttaccatgatctgctgaagataatcaagacaagatttctcagataatgaggagaacgaggacatcctggaagatctgctgacct  
tgactctgttcgaggatagagatgatcgaagagcgcctgaagacctatgccatctgtttgacgataaagtcataaacagctcaag  
cggcggcgtactggtgggtgagctctccaggaactcataaacggcattccgcgacaaacagagcggaaaaccatcctgg  
attcctgaaatccgacggatcgtcaaacaggaacttcatgcaactgattcacgatgactctctgacatttaagaggacatccagaaggc  
acaggtgagcgtcaagcgcacagcctgcacgagcacatcggcaacctcgtggatcaccgccataaagaagggaatactgcag  
acagtcaaggtcgtggacgaactgtcaaatgatgggtcggcacaagccagagaatcgttaccgaaatggcaagggaacca  
accaccagaaaggccagaagaactctcgggaacggatgaaaagaatcgaagagggaatttaaggagctgggatctcagatactga  
aggagcaccctgtggagaatacacagctccagaacgagaactctacctgtactacctccagaacgggcgggacatgtacgttgacc  
aggaaactgacatcaaccggctgtccgattatgacgtggaccatattgtccacagctcctctcaagatgactccattgacaacaaggt  
gctgaccagatccgataagaatcgggtaagtctgacaatgttccatcagaagaggtgtcaagaagatgaagaattactggcggcag  
ctctcaacgccaaactgatcaccagcggaggttgacaatctgactaaggcagaagaggaggctgagcgaactgacaaggcc  
ggctttattaaggcaactggtcgaacacgccagattaccaaacacgtggcacaatcctcactctaggtgaaactaagctacga  
tgagaacgataagctgatcagggaagtgaagtataactctgaagagcaagctggtgtctgactccggaaaggactttcaatttaca  
aagttcgcgaaataaacaattaccatcatgctcacgatgcctatctcaatgctgtcgttggcaccgccctgatcaagaaatccctaaact  
ggagctgagttcgtgtacggtgactataaagtctacgatgtgaggaagatgatagcaagctctgagcaagagattggcaaaagccacc  
gccaaagtactcttactctaataatcatgaatttcttaagactgagataaccctggctaacggcgaatccggaaagcggccactgatcg

aaacaaacggagaaacaggagaatcgtgtgggataaaggcaggacttcgcaactgtcgggaaggtgctgtccatgccacaagtc  
aatatcgtgaagaagaccgaaagtcagaccggcggattctcaaggagagcctcctccaaaagcggactctgacaagctgatcgc  
caggaaagaaagattgggacccaaagaagtatggcggtttcgattcccctacagtggcttattccgttctggctgtggcaaaagtgaga  
aaggcaagtcacaagaactcaagctctgftaaggagctgctcggaaactatfatggagagatccagcttcgagaagaatccaatcatt  
tcttggaaagtaagggtataaagaagtgaagaaagatctcatcaaaactgcccaagctctctctttgagctggagaatggtagga  
agcggatgctggcctccgccggagagctgcagaaagaaaagagctggctctgccctccaaatcgtgaacttctgtatctggcctc  
ccactacgagaaactcaaaagtagccctgaagacaatgagcagaagcaactcttggtagcaacataaacactacctggacgaaatc  
attgaacagattagcaggtcagcaagcgggttattctggccgatgcaaacctcgataaagtgctgagcgcataataagcacaggga  
caagccaattcgcgaacagcagagaatattaccctcttactctgactaatctggcgcctcctgctgcttcaagatttcgatacaa  
ctattgacaggaagcggfacacctctaccaagaagtctcgcgatccacctgataccagtcattaccggactgtacgagactcgc  
atcgacctgtctcagctcggcggcgaatag

pST1374-NLS-flag-Cas9

atgggacctaagaaaaagaggaggtggcggccgctgactacaaggatgacgacgataaatctagagacaagaaactctattgga  
ctggatacgggacaaactccgttggctggccgctcacaaccgacgagataaaggtccaagcaagaaattcaaggtgctgggtaata  
ctgaccgccattcaatcaagaagaacctgatcggagcactcctctcactccgtgaaaccgtgaagctactcggctgaagcggac  
cgcaagcggagatacaccgccgcaagaatcgatattctgcaagagatcttagcaaacgaaatggctaaggtggacgactcc  
ttcttaccgctggagagagctttctggtggaggagataaagaacacgagagggaccctatattcggaaatctggtgatgaggt  
ggcttaccatgaaaagtatcctacaatctaccatctgaggaagaagctggtggacagcaccgataaagcagacctgaggtcctctac  
tgccctggctcatatgataaagtttagaggacacttctgatcaggggcgacctgaatccgataattccgatgtggataaaccttctcatt  
caactggtgcagacataataccaactgttcgaggagaatcccataaacgcttctggtgtggatgccaaaggctattctgctcgcggctg  
tccaagtcacgcagactggagaatctgattgcccaactgccaggagaaaagaagcggcctgttgggaacctcatcgccctgagc  
ctggcctgacacctcaactcaagccaattttgatctggccgaagatgtaaacctcagctcctcaaggacacctatgacgatgatctg  
gacaacctgctgcacagatagggcaccagctacgccgatcttctggtgctgtaagaatctctccgacgccattctgctgagcgacata  
ctccgggtcaaacctgagatcaccaaacctctgagcgcctccatgataaacgctatgatgaacacctcaagacctgactctgct  
caaaagcctctgaggcaaacgctgccagagaagtacaaaagatattcttcgaccagagcaagaatggatagccggatacctgga  
tgccggagcatcacaggaaagaatttacaagttcatcaaaccaatcctcgagaagatggacggactgaaagctgctggtgagctg  
aacagggaggacctgctgaggagcagaggacctttgataatggctcattccatcagatacacctgggagagctgcatgcaatcc  
tccgagcaggagattctatcttctgaaggataaccgggagaagatagagaagatctgacctcaggatcccttattacgtcg  
gccctctggctagaggcaactcccgttcgcttggatgaccaggaaatctgaggagacaattactcctggaactcgaagagctcgtg  
gataagggcgcaagcggccagctcattcagcaacggatgaccaatttcgataagaacctgcccaacgagaaggtcctgccaaacatt  
cactcctgtacgagtattaccgtctataacgagctgactaaaagtgaagctgaccgagggcatgaggaaagcctgccttctgtccg  
gagagcagaagaaagctatcgtgatctcttcaagactaataaaggtgacagtgaaagcagctcaaggaggattacttaagaag  
atcgaatgcttctgactcagtgaaatctctggcgtggagaccgcttfaatgcagcctgggcacttacatgatctgctgaagataatca  
aagacaaagatttctcagataatgaggagaacgaggacatcctggaagatactgctgctgacctgactctgttcgaggatagagagatg  
atcgaagagcgcctgaaagacctatgccatctgtttgacgataaagctatgaaacagctcaagcggcggcgtactggtgggta  
gactctccaggaaactcataaacggcatccgcgacaacagagcggaaagacctcctggatttctgaaatccgacgattcgttaa  
caggaaactcatgcaactgattcacgatgactctctgacattaaagaggacatccagaaggcacagggtgagcggcaagggcagacgc  
ctgcacgagcactcggcaacctcgtggatcaccgccataaagaagggaataactgcagacagtcagggtcgtggacgaaactcgtc  
aaagtatgggtcggcacaagccagagaatctggtatcgaatggcaaggagaaaccccaagaggccagaagaact  
ctcgggaacggatgaaaagaatcgaagagggaatgaaggagctggatctcagatactgaaggagcacctgtggagaatacacag  
ctccagaacgagaactctactgtactacccagaacggcgggacatgtacgttgaccaggaactcagatcaaccggctgtccg  
attatgactggaccatattgtccagctcctcctcaagatgactccattgacaacaaggtgctgaccagatccgataagaatcgcg  
gtaagtctgacaatgtccatcagaagaggtgtcaagaagatgaagaactgagcggcagctcctcaacgccaaactgatcaccca  
gcggaaagttgacaatctgactaaggcagaagaggaggtctgagcgaactcacaaggcggcttattaaaggcaactggtcga

aacacgccagattaccaaacacgtggcacaatcctcactctaggatgaactaagtagatgagaacgataagctgatcaggga  
agt gaaagt gataactctgaagagcaagctgggtgtctgactccggaaggactttcaattctacaagttcgcgaaataaacaattaccat  
catgctcacgatgcctatctcaatgctgtcgttggcaccgccctgatcaagaataaccctaaactggagtctgagttcgtgtacggtgact  
ataaagtctacgatgtgaggaagatgatagcaaaagtctgagcaagagattggcaaagccaccgccaagtacttcttactctaatatca  
tgaatttcttaagactgagataaaccttgctaacggcgaaatccggaagcgccactgatc gaaacaaacggagaaacaggagaaat  
cgtgtgggataaaggcagggtctcgaactgtcgggaaggtgtgtccatgccacaagtcaatcgtgaaagaagaccgaaagtga  
gaccggcgattctcaaggagagc atctgcgcaagcggaactctgacaagctgatc gccaggaagaaagattgggacccaaga  
agtatggcggttcgattcccctacagtggttattccgttctggtcgtggcaaaagtggagaaaggcaagtc aagaaactcaagtctg  
ttaaggagctgctc ggaattactattatggagatccagcttcgagaagaatccaatcgatttctggaaagctaaaggctataaagaag  
tgaagaaagatc atcatcaaaactgccaaagtactctctttgagctggagaatggtaggaaaggatgctggcctccgccggagag  
ctgcagaaaaggaaacgagctggctctgccctc caaatacgtgaacttctgtatctggcctccactacgagaaactcaaaggtagcc  
tgaagacaatgagcagaagcaactctttgtgagcaacataaacactacctggacgaaatcattgaacagattagcagttcagcaagc  
gggttattctggccgatgcaaacctcgataaagtctgagcgcataataaagcacagggacaagccaattcgcgaaacaagcagaga  
ataatccacctcttactctgactaatctgggcgctcctgctgcttcaagtattc gatacaactattgacaggaaagcggtagacctctac  
caaagaagtctc gatgccaccctgatacaccagtc aattaccggactgtacgagactcgcacgacctgtctcagctcggcggcgact  
ag

pST1374-NLS-flag-Cas9-NLS

atgggacctaagaaaaagggaaggtggcggccgctgactacaaggatgacgacgataaatctagagacaagaaactctattgga  
ctggatcgggacaaactccgttggctggccgtcataaccgacgagataaaggtccaagcaagaaattcaagtgctggtaata  
ctgaccgccattcaatcaagaagaacctgatcggagcactcctctcactccggtgaaaccgctgaagctactcggctgaaaggac  
cgcaaggcggagatacaccgccgcaagaatcgatattgtatctgcaagagatcttagcaaacgaaatggctaagggtggacgactcc  
ttcttcaccgctggaagagagctttctggtggaggataaagaaacacgagaggcaccctatattcggaaatcgtggatgaggt  
ggcttaccatgaaaagtatcctacaatctaccatctgaggaaagagctggtggacagcaccgataaagcagacctgaggctcatctac  
tggcctggctcatatgataaagtttagaggacactttctgatcaggggcagctgaaatccgataatccgatgtggataaactctcatt  
caactggtgcagacataaaccactgttcgaggagaatccataaacgcttctggtgtggatgccaaggctattctgtccgctcggctg  
tccaagtacgcagactggagaatctgattgccaaactgccaggagaaaagaagacggcctgtttggaaacctatcggcctgagc  
ctggcctgacacctaactcaagtccaatttctgatcggcgaagatgctaaactccaagctccaaggacacctatgacgatgatctg  
gacaacctgctgcacagataggcgaccagtacgccgatctttctggctgctaagaatctctccgacgccattctgctgagcgacata  
ctccgggtcaactgagatcaccaaaacacctctgagcgcctcatgataaacgctatgatgaacaccatcaagacctgactctgct  
caaagccctcgtgaggcaacagctgccagagaagfacaaagagatattctcagaccagagcaagaatggatgcccggatacgcga  
tggcggagcatcacaggaaagaatttacaagttcatcaaccaatcctcagagaagatggacgggtactgaagagctgctggtgaagctg  
aacaggggagacctgctgaggagcagaggacctttgataatggctccattccatcagatacacctgggagagctgcatgcaatcc  
tccgaggcaggagatttctatcttctgaaggataaccgggagaagatagagaagatcctgacctcaaggatcccttattacgtcg  
gccctctggctagaggcaactccgcttcgcttggatgaccaggaaatctgaggagacaattactcctggaactcgaagaggtcgtg  
gataaggcgcaagcgccagtcattcatcgaacggatgaccaatctc gataagaacctgcccaacgagaaggtcctgccaaacatt  
cactcctgtacgagtattcaccgtctataacgagctgactaaaagtgaagtagctgaccgagggcatgaggaagcctgccttctgtccg  
gagagcagaagaaaggctatcgttctgcttcaagactaataaaaaggtgacagtgaaagcagctcaaggaggattactttaaagaag  
atcgaatgcttctgactcagtgaaatctctgctggtgaggaccgcttfaatgcagcctgggcacttaccatgatctgctgaagataatca  
aagacaaagatttctc gataatgaggagaacgaggacatcctggagataatcgtgctgacctgactctgttcgagatagagagatg  
atcgaagagcgcctgaagacctatgccatctgtttgacgataaagtcataaaacagctcaagcggcggcgtactgggtgggta  
gactctccaggaactcataaacggcatccgcgacaacagagcggaaagacctcctgatttctgaaatccgacggattcgttaa  
caggaactcatgcaactgattcacgatgactctctgacattaaaggagatccagaaggcacaggtgagcggtaaggcgacagc  
ctgcacgagc acatgccaacctcgtggatcaccgccataaagaagggaatactgcagacagtc aaggtcgtggacgaactcgtc

aaagtgatgggtcggcacaagccagagaatcgtfctcgtgaaatggcaaggagagaaccaaaccaccaagaaggccagaagaact  
ctcgggaacggatgaaaagaatcgaagagggaatfaaggagctgggatctcagatactgaaggagcacctgtggagaatacacag  
ctccagaacgagaaactctactgtactacccagaacgggcgggacatgtactgtgaccaggaactcgcacatcaaccggctgtccg  
attatgacgtggaccatattgtccacagtcctcctcaagatgactccattgacaacaaggctgaccagatccgataagaatcgcg  
gtaagtctgacaatgtccatcagaagaggtggtcaagaagatgaagaactactggcggcagctcctcaacgccaaactgatcacca  
gcgggaagtttgacaatctgactaaaggcagaagaggaggtctgagcgaactcgaaggccggctttattaagaggcaactggtcga  
aacacgccagatfaccacaacacgtggcacaatcctcgtactctaggatgaacactaagtacgatgagaacgataagctgatcaggga  
agtgaagtataactctgaagagcaagctggtgtctgactccggaggactttcaattctacaagttcgcgaaataaacaattaccat  
catgctcacgatgcctatctcaatgctgtcgttggcaccgccctgatcaagaataaccctaaactggagtctgagttcgtgtacggtgact  
ataaagtctacgatgaggaagatgatagcaagctctgagcaagagattggcaaaagccaccgcaagctactcttctactataatca  
tgaatttcttaagactgagataaccctggctaaccggcgaatccggaaagcggcactgatcgaacaacgggagaacaggagaat  
cgtgtgggataaaggcaggacttcgcaactgtcgggaaggtgctgtccatgccacaagtcaatctgtgaagaagaccgaagtgca  
gaccggcggattctcaaaaggagagcactctgcaaaagcggaaactctgacaagctgacgccaggaagaagattgggacccaaa  
agatgagcgggttcgattccctacagtggttattccgttctggtcgtggcaaaagtggagaagagcaggtccaagaactcaagctg  
ttaaggagctgctcggaaactattatggagagatccagctcggagaagaatccaatcgatttctggaagctaaaggctataaagaag  
tgaagaaagatctcatcaaaactgcccaagctctctctttgagctggagaatggtaggaaagcggatgctggcctccgccggagag  
ctgcagaaaaggaaacgagctggctctgcctccaaatctgtaactcctgtatctggcctccactacgagaaactcaaaaggtagccc  
tgaagacaatgagcagaagcaactctttgtgagcaacataaacactacctggacgaaatcattgaacagattagcagttcagcaagc  
gggttattctggccgatgcaaacctcgataaagtgtgagcgcataataaagcacagggacaagccaattcgcgaacaagcagaga  
ataatccacctcttactctgactaatctgggcgctcctgctgcctcaagtatttcgatacaactattgacaggaagcgggtacacctctac  
caaagaagtctcgtatgccaccctgatacaccagctcaatccggactgtacgagactcgcacgacctgtctcagctcggcggcgcac  
cctaagaaaaagaggaaggtgtag

pST1374-3xNLS-flag-Cas9

atgggacctaagaaaaaggaaggtgcctaagaaaaagaggaaggtgcctaagaaaaagaggaaggtggcggccgctgactac  
aaggatgacgacgataaatctagagacaagaaactctattggactggatcgggacaaactccgttggctgggcccgtcataaccg  
acgagtataaggtgccaaagcaagaatcaaggtgctgggtaatactgaccgccattcaatcaagaagaacctgatcggagcactcct  
cttcgactccggtgaaaccgctgaagctactcggctgaagcggaccgcaagcggagatacaccgccgaagaatcggatattgta  
tctgcaagagatctttagcaacgaaatggctaaaggtggacactcctcttaccgccctggaagagagctttctggtggaggagataa  
gaaacacgagagcaccctataatcggaaatcgtggatgaggtggcttaccatgaaaagtatcctacaatctaccatctgaggaaga  
agctggtggacagcaccgataaagcagacctgaggtcattctatctggcctgctcatatgataaagtftagaggacattctgatc  
agggcgactgaaatcccgataatccgatgtgataaactcttcaactgggtgcagacataataaccaactgttcgaggaagaatcca  
taaacgcttctggtgtggatgccaaaggtattctgtccgctcggctgtcaagtcacgcagactggagaatctgattgcccactgccag  
gagaaaaagaagaacggcctgtttgggaacctcaccctgagcctgggctgacacctaactcaagtcattttgatctggccgaa  
gatgctaaactccagctctcaagacacatgacgatgatctggacaacctgctcgcacagataggcgaccagttacgccgatctctt  
tctggctgctaagaatctctccgacgccattctgctgagcgacatactccgggtcaaacactgagatcaccaaagcactctgagcgcct  
ccatgataaaacgctatgatgaacacatcaagacctgactctgctcaaaagccctcgtgaggcaacagctgccagagaaggtacaaga  
gatattcttcgaccagagcaagaatggatattgccggatcctgatggcggagcatcacaggaagaattttacaagttcatcaaaccaat  
cctcagagaagatggacggfactgaagagctgctggtgaagctgaacaggaggacctgctgaggaagcagaggacctttgataatg  
gtcattccacatcagatacactgggagagctgcatgcaatcctccgagcagaggatttctatcttctctgaaggataaccgg  
gagaagatagagaagatctgaccttcaggatcccttattactcggccctctggctagaggcaactcccgttcgcttgatgaccag  
gaaatctgaggagacaattactccttggaaactcgaagaggtcgtgataaaggcgcgaagcggcagctcattcatcgaacggatgacc  
aatttcgataagaacctgccaacgagaaggtcctgccaaacattcactcctgtacgagatttcaccgtctataacgagctgactaaa  
gtgaagtacgtgaccgagggcatgaggaagcctgcctctctgcccggagagcagaagaaggctatcgttgatctgcttcaagacta

atagaaaggtagacgtgaagcagctcaaggaggattactttaagaagatcgaatgctttgactcagtggaatctctggcgtggaggac  
cgctttaatgccagcctgggcacttaccatgatctgctgaagataatcaaaagacaaagattcctcgataatgaggagaacgaggacatc  
ctggaagatactgctgacccctgactctgttcgaggatagagagatgatcgaagagcgcctgaagacatgccccctgtttgacgat  
aaagtcataaagcctcaagcggcggcgttacactgggtgggtgtagactctccaggaaactcataaacggcatccgcgacaaca  
gagcggaaagaccatcctggattcctgaaatccgacggattcgttaacaggaactcatgcaactgattcacgatgactctctgacatt  
aaagaggacatccagaaggcacaggtgagcggtaaggcgacagcctgcacgagcacatcgccaacctcgtggatcaccgccca  
taagaagggaatactcgagacagtcgaagtcgtggcgaactcgtcaagtgatgggtcggcacagccagagaatatactgtatcg  
aatggcaagggaaccaaacaccaccagaaggccagaagaactctcgggaacggatgaaaagaatcgaagagggaatfaagg  
agctgggatctcagatactgaaggagcacctgtggagaatacacagctccagaacgagaaactctactgtactacctccagaacgg  
cggggacatgtactgtgaccaggaactgacatcaaccggctgtccgattatgactgtggaccatattgtccacagtccttctcaaga  
tgactccattgacaacaaggtgctgaccagatccgataagaatcgcggtaagtctgacaatgttccatcagaagaggtggtcaagaag  
atgaagaattactggcggcagctcctcaacgccaaactgatcaccagcggaaagttgacaatctgactaaggcagaaagaggaggt  
ctgagcgaactcgacaaggccggctttattaagaggcaactggcgaacacgccagattaccaaacagctggcacaatcctcgtact  
ctaggatgaactaagtagatgagaacgataagctgatcagggaagtgaagtgataactctgaagagcaagctggtgtctgacttc  
cggaaaggactttcaattctcaaaagttcgcgaaataaacaattaccatcatgctcacgatccctatctcaatgctgtcgttggaccgccct  
gatcaagaataaccctaaactggagctgtgattcgtgtacggctactataaagtctacgatgtgaggaaatgatagcaaaagctgagc  
aagagattggcaaaagccaccgccaaagctcttactctaatatcatgaattctttaagactgagataaacctggctaaccggcgaatc  
cggaaagcggcactgatcgaacaacgggaaacaggagaaatcgtgtggataaaaggcaggagcttcgcaactgtcgggaagg  
tgctgtccatgccacaagtcataatcgtgaagaagaccgaagtgacagaccggcggattctcaaggagagcactcctccaaagcggga  
actctgacaagctgatcgccaggaagaagattgggacccaaagaagtatggcggtttgattccctacagtggttattccgttctgg  
tcgtggcaaaagtggaagaaggcaagtcgaagaactcaagctgttaaggagctgctcggaaactattatggagagatccagcttc  
gagaagaatccaatcatttctggaagctaaaggctataaagaagtgaagaagatctcatcaaaactgccaaagctctctctttg  
agctggagaatgtaggaagcggatgctggcctccgccggagagctgcagaaggaacgagctggctctgccctccaaatacgtg  
aactcctgtatctggcctcccactacgagaaactcaaaagtagccctgaagacaatgagcagaagcaactctttgtgagcaacataaa  
cactacctggacgaaatcattgaacagattagcagttcagcaagcgggtattctggccgatgcaaacctcgataaagtctgagcgc  
atataataagcacagggacaagccaattcgcgaacaagcagagaatattatccacctttactctgactaatctgggcgctcctgctgc  
cttcaagatttcgatacaactattgacaggaaagcgttacacctctaccaagaagttctcgatgccaccctgatacaccagtcattacc  
ggactgtacgagactcgcacgacctgtctcagctcggcggcgaatc

pST1374-NLS-flag-linker-Cas9

atgggacctaagaaaaagaggaaggtggcggccgctgactacaaggatgacgacgataaatctagactggaacccggcgaagac  
catacaaatgccagagtggtgtaaatcttctcagctgtgtgctctgaccagacaccagcggaccacactagagacaagaatac  
tctattggactggatacgggacaaactccgttggtggccgtcataaccgacgagtataaggtgccaagcaagaattcaaggtgct  
gggtaatactgaccgccattcaatcaagaagaacctgatcggagcactcctctcactccggtaaacctgaaactcctggctga  
agcggaccgcaagcggagatacaccgccgaagaatcggatatttatctgcaagagatcttagcaaacgaaatggctaaggtgg  
acgactcctcttaccgcctggaagagagcttctgtggaggagataagaacacgagagcaccctatatcggaaatcctg  
gatgaggtggcttaccatgaaaagtatcctacaatctaccatctgaggaaagctggtggacagcaccgataaagcagacctgagc  
tcatctatctggcctggctcatatgataaagtttagaggacactttctgacgagggcgaactgaaatccgataatccgatgtgataaa  
ctcttcattcaactggtcgagacataaactgttcgaggagaatccataaacgcttctggtgtggatgccaaagcttattctgctc  
ctcggctgtcaagtcacgcagactggagaatctgattgccaaactgccaggagaaaagaagcggcctgtttgggaacctatcgc  
cctgagcctggcctgacacctaactcaagtccaattttgatctggccgaagatgctaaactcagctctccaaggacacctatgacga  
tgatctggacaacctgctcgcagatagggcaccagtagccgatctcttctggctgctaagaatctctccgacgccattctgtag  
cgacatactccgggtcaactgagatcaccaaagcactctgagcgcctccatgataaacgctatgatgaacacctcaagacctg  
actctgctcaaaagcctcgtgaggaacagctgccagagaagtaacaagatattctcagcagcaagaatggatagccggat

acatcgatggcggagcatcacaggaagaatfttacaagttcatcaaaccaatcctcgagaagatggacggactgaagagctgctggt  
gaagctgaacagggaggacctgctgaggaagcagaggaccttgataatggctccattcacatcagatacacctgggagagctgca  
tgcaatcctccgagggcaggaggatttctatccttctgaaggataaccgggagaagatagagaagatcctgacctcaggatccctta  
ttacgtcggcctctggctagaggaactcccgttcgcttgatgaccaggaaatctgaggagacaattactccttggaaactcgaaga  
ggctgtggataaggcgcgaagcggccagtcattcgcgaacggatgaccaatftc gataagaacctgccaacgagaaggctcctgcc  
caaacattactcctgtacgagatfttcaccgtctataacgagctgactaaagtgaagtacgtgaccgagggcatgaggaagcctgcctt  
cctgtccggagagcagaa gaaggctatcgttgatctgcttcaagactaatagaaagggtgacagtgaagcagctcaaggaggattact  
ttaagaagatgaatgctttgactcagtgaaatctctggcgtggaggaccgtftaatgccagcctgggcacttaccatgatctgctgaa  
gataatcaaagacaaagatttctc gataatgaggagaacgaggacatcctggaagatcgtgctgacctgactctgttcgaggata  
gagagatgatcgaagagcgcctgaagacatgcccactctgttgacgataaagtcataaacagctcaagcggcggcgtactg  
ggtggggtagactctccaggaaactataaacggcatccgcgacaacagagcggaaagaccatcctggatttctgaaatccgacg  
gattc gtaacaggaactcatgcaactgattcacgatgactctgacattaaaggacatccagaaggcacaggtgagcggtaaa  
ggcgacagcctgcacgagcacatc gccaacctcgtggatcaccgccataaagaagggaatactgcagacagcaaggtcgtgga  
cgaactcgtcaagtgatgggtcggcacaagccagagaatcgttatgaaatggcaagggaagaaccaaccaccagaagggcc  
agaagaactctcgggaacggatgaaaagaatcgaagagggaatfaaggagctgggatctcagatactgaaggagcacctgtggag  
aatacacagctccagaacgagaaactctactgtactcctcagaacgggcgggacatgtacgttgaccaggaactcgcataacc  
ggctgtccgattatgacgtggaccatattgtccacagtccttctcaaatgactccattgacaacaagggtgctgaccagatccgataa  
gaaatcgcggtaagtctgacaatgttccatcagaagaggtggtcaagaagatgaagaattactggcggcagctcctcaacgccaactg  
atcaccagcgggaagtttgacaatctgactaaggcagaaaaggaggtctgagcgaactc gacaaggccggctttattaagggcaa  
ctggtcgaaacacccagattaccaaacacgtggcacaatcctc gactctaggatgaacactaagtacgatgagaacgataagctga  
tcagggaagtgaagtgataactctgaagagcaagctggtgtctgacttccggaaggacttcaattctcaaaagttcgcgaaataaaca  
attaccatcatgctcacgatgcctatctcaatgctgtcgttggcaccgccctgatcaagaaataccctaaactgga gctgagttcgtgac  
ggtgactataaagtctacgatgtgaggaagatgatagcaaaagtctgagcaagagattggcaagccaccgccaaagtacttcttactct  
aatatcatgaatttcttaagactgagataaacctggctaacggc gaaatccggaagcggccactgatc gaaacaacgggaaacag  
gagaatcgtgtgggataaaggcagggacttcgcaactgtcgggaaggtgctgtccatgccacaagtc aatcgtgaagaagaccg  
aagtgcagaccggcggattctcaaaggagagcactcctgccaagcggaaactctgacaagctgacgccaggaa gaaagattgggac  
ccaaagaagtatggcggttc gattcccctacagtggttattccgttctggtcgtggcaaaagtgga gaaagcaagtc caagaact  
caagtctgtaaggagctgctcggaaftactattatggagagatccagctc gagaagaatccaatc gatttctggaagctaaggctat  
aaagaagtgaagaaagatctcatcaaaactgccaagtactctctttgagctggagaatggtaggaaagcggatgctggcctccgc  
cggagagctgcagaaaaggaaacgagctggctctgcctccaaatcgtgaacttctgtatctggcctcccactacgagaaactcaa  
ggtagccctgaagacaatgagcagaagcaactctttgtgagcaacataaaactactcctggacgaaatcattgaacagattagcaggt  
cagcaagcgggttattctggccgatgcaaacctc gataaagtctgagcgcataataaagcacagggacaagccaattcgcgaaca  
agcagagaatattatccacctcttactctgactaatctgggc gctcctgctgccttcaagtatttcgatacaactattgacaggaaagcgt  
acaccttaccaaagaagttctc gatgccacctgatacacagtc aattaccggactgtacgagactcgcacgacctgtctcagctcg  
cggcgac tag
